# Supplementary material
Source: HighWire-hosted journal article supplement (https://bmjopen.bmj.com/content/12/4/e055132)
Supplement: inline-supplementary-material-1 [file inline-supplementary-material-1.pdf]

Appendix 1. Database Search Strategies**Ovid MEDLINE**

|    |                                                                                                                                                                                                                                                                                                                                                                                                                                      |
|----|--------------------------------------------------------------------------------------------------------------------------------------------------------------------------------------------------------------------------------------------------------------------------------------------------------------------------------------------------------------------------------------------------------------------------------------|
| 1  | exp Medical Records Department, Hospital/ or exp Dental Records/ or exp Records/ or records or entries.mp                                                                                                                                                                                                                                                                                                                            |
| 2  | (note* or text*).ti,ab                                                                                                                                                                                                                                                                                                                                                                                                               |
| 3  | exp "Information Storage and Retrieval"/ or exp informatics / or exp Artificial Intelligence/ or natural language.mp. or exp Language/ or exp Pattern Recognition, Automated/ or exp Neural Networks, Computer                                                                                                                                                                                                                       |
| 4  | (text mining or <b>data mining or machine learning or natural language processing or semantic* or narrative text*</b> or text descrip* or <b>text field*</b> ).mp.                                                                                                                                                                                                                                                                   |
| 5  | 1 or 2 or 3 or 4                                                                                                                                                                                                                                                                                                                                                                                                                     |
| 6  | emergency treatment/ or emergency medicine/ or exp emergency health service/ or evidence based emergency medicine/ or emergency nursing/ or exp emergency care/ or emergency ward/ or (emergicent* or ((emergenc* or ED) adj1 (room* or accident or ward or wards or unit or units or department* or physician* or doctor* or nurs* or treatment*or visit*))) .mp. or (triage or critical care or (trauma adj1 (cent* or care))).mp. |
| 7  | exp Nursing/ or exp Nursing Staff/ or nurs*.mp.                                                                                                                                                                                                                                                                                                                                                                                      |
| 8  | 6 or 7                                                                                                                                                                                                                                                                                                                                                                                                                               |
| 9  | Triag*.mp                                                                                                                                                                                                                                                                                                                                                                                                                            |
| 10 | (Austral* Triage Scale or Canadian Triage Acuity Scale or Canadian triage acuity scale or Emergency Severity Index or Manchester Triage Scale or South African Triage Scale or CTAS or ESI or MTS or SATS).ti,ab.                                                                                                                                                                                                                    |
| 11 | 9 or 10                                                                                                                                                                                                                                                                                                                                                                                                                              |
| 12 | 5 and 8 and 11                                                                                                                                                                                                                                                                                                                                                                                                                       |
| 13 | limit 12 to (yr="1990-Current" and English)                                                                                                                                                                                                                                                                                                                                                                                          |

**EMBASE Search Filter**

|    |                                                                                                                                                                                                                                                                                                                                                                                                                                    |
|----|------------------------------------------------------------------------------------------------------------------------------------------------------------------------------------------------------------------------------------------------------------------------------------------------------------------------------------------------------------------------------------------------------------------------------------|
| 1  | exp Medical Records Department, Hospital/ or exp Dental Records/ or exp Records/ or records or entries.mp                                                                                                                                                                                                                                                                                                                          |
| 2  | (note* or text*).ti,ab                                                                                                                                                                                                                                                                                                                                                                                                             |
| 3  | exp "Information Storage and Retrieval"/ or exp informatics / or exp Artificial Intelligence/ or natural language.mp. or exp Language/ or exp Pattern Recognition, Automated/ or exp Neural Networks, Computer/                                                                                                                                                                                                                    |
| 4  | (text mining or <b>data mining</b> or <b>machine learning</b> or <b>natural language processing</b> or <b>semantics</b> or <b>narrative text*</b> or text descrip* or text field*).mp.                                                                                                                                                                                                                                             |
| 5  | 1 or 2 or 3 or 4                                                                                                                                                                                                                                                                                                                                                                                                                   |
| 6  | emergency treatment/ or emergency medicine/ or exp emergency health service/ or evidence based emergency medicine/ or emergency nursing/ or exp emergency care/ or emergency ward/ or (emergent* or ((emergenc* or ED) adj1 (room* or accident or ward or wards or unit or units or department* or physician* or doctor* or nurs* or treatment* or visit*))).mp. or (triage or critical care or (trauma adj1 (cent* or care))).mp. |
| 7  | exp Nursing/ or exp Nursing Staff/ or nurs*.mp                                                                                                                                                                                                                                                                                                                                                                                     |
| 8  | 6 or 7                                                                                                                                                                                                                                                                                                                                                                                                                             |
| 9  | Triag*.mp                                                                                                                                                                                                                                                                                                                                                                                                                          |
| 10 | (Austral* Triage Scale or Canadian Triage Acuity Scale or Canadian triage acuity scale or Emergency Severity Index or Manchester Triage Scale or South African Triage Scale or CTAS or ESI or MTS or SATS).ti,ab.                                                                                                                                                                                                                  |
| 11 | 9 or 10                                                                                                                                                                                                                                                                                                                                                                                                                            |
| 12 | 5 and 8 and 11                                                                                                                                                                                                                                                                                                                                                                                                                     |
| 13 | limit 12 to (yr="1990-Current" and English)                                                                                                                                                                                                                                                                                                                                                                                        |

**CINAHL**

|   |                                                                                                                                                                                                                                                                                                                                                                               |
|---|-------------------------------------------------------------------------------------------------------------------------------------------------------------------------------------------------------------------------------------------------------------------------------------------------------------------------------------------------------------------------------|
| 1 | (MM "Charting+") OR (MM "Coding+") OR (MM "Nursing Orders") OR (MM "Shift Reports") OR (MM "Medical Records") OR (MM "Information Management") OR (MM "Data Analytics")                                                                                                                                                                                                       |
| 2 | (MH "Decision Making, Computer Assisted+") OR (MH "Data Mining") OR (MH "Data Collection, Computer Assisted") OR (MH "Data Analysis, Computer Assisted+") OR (MH "Artificial Intelligence+") OR (MH "Minimum Data Set+") OR (MH "Health Informatics+")                                                                                                                        |
| 3 | (MH "Emergency Service+") or (MH "Emergency Medicine") or (MH "Physicians, Emergency") OR (MH "Emergency Nurse Practitioners") or (MH "Emergency Nursing+") or (MH "Emergency Patients") or "casualty department*" or ((emergenc* or "ED") N1 (room* or accident or ward or wards or unit or units or department* or physician* or doctor* or nurs* or treatment* or visit*)) |
| 4 | "Austral* Triage Scale" or "Canadian Triage Acuity Scale" or "Emergency Severity Index" or "Manchester Triage Scale" or "South African Triage Scale" or CTAS or ESI or MTS or SATS or (MM "Triag*")                                                                                                                                                                           |
| 5 | 1 or 2 and 3 and 4 (restrict to peer review, with abstract, published 1990-2021)                                                                                                                                                                                                                                                                                              |

**ProQuest**

|   |                                                                                                                                                                                                                                                                                                 |
|---|-------------------------------------------------------------------------------------------------------------------------------------------------------------------------------------------------------------------------------------------------------------------------------------------------|
| 1 | noft(records, hospital) OR noft(records, nursing) OR noft(records, medical) OR noft(medical records, computerized) OR noft(information storage and retrieval systems) OR noft(Informatics) OR noft(Artificial Intelligence) OR noft(natural language) OR noft(machine learning)                 |
| 2 | noft(Emergency Treatment) OR noft(Emergency Medicine) OR noft(emergency medical services) OR noft(emergency service) OR noft(Hospital) OR noft(trauma centers) OR noft(Evidence-Based Emergency Medicine) OR noft(Emergency Nursing) OR noft(casualty department) OR noft(nurse) OR noft(nurs*) |
| 4 | noft(Austral* Triage Scale) or noft(Canadian Triage Acuity Scale) or noft(Emergency Severity Index) or noft(Manchester Triage Scale) or noft(South African Triage Scale) or noft(CTAS) or noft(ESI) or noft(MTS) or noft(SATS) or noft(Triag*)                                                  |

**Cochrane**

|    |                                                                                                                                                                                                                                                                                                                                                                                                                                     |
|----|-------------------------------------------------------------------------------------------------------------------------------------------------------------------------------------------------------------------------------------------------------------------------------------------------------------------------------------------------------------------------------------------------------------------------------------|
| 1  | [mh "Medical Records Department, Hospital"] or [mh "dental records"] or [mh "Dental Records"] or [mh "Records"]                                                                                                                                                                                                                                                                                                                     |
| 2  | (note* or text *):ti,ab,kw                                                                                                                                                                                                                                                                                                                                                                                                          |
| 3  | [mh "Information Storage and Retrieval"] or [mh "informatics"] or [mh "Artificial Intelligence"] or [mh "natural language"] or [mh "Language"] or [mh "Pattern Recognition, Automated"] or [mh "Neural Networks, Computer"] or [mh "text mining"] or [mh "data mining"] or [mh "machine learning"] or [mh "natural language processing"] or [mh "semantics"] or [mh "narrative text*"] or [mh "text descrip*"] or [mh "text field"] |
| 4  | 1 or 2 or 3                                                                                                                                                                                                                                                                                                                                                                                                                         |
| 5  | [mh "Emergency Treatment"] or [mh "Emergency Medicine"] or [mh "emergency medical services"] or [mh "emergency service, hospital"] or [mh "trauma center"] or [mh "Evidence-Based Emergency Medicine"] or [mh "Emergency Nursing"] or [mh "Emergencies"] or [mh "emergent*"] or [mh "casualty department*"]                                                                                                                         |
| 6  | (emergenc* NEAR/1 (room* or accident or ward or wards or unit or units or department* or physician* or doctor* or nurs* or treatment* or visit*)):ti,ab,kw                                                                                                                                                                                                                                                                          |
| 7  | [mh "Nursing"] or [mh "Nurs*"]                                                                                                                                                                                                                                                                                                                                                                                                      |
| 8  | 6 or 7                                                                                                                                                                                                                                                                                                                                                                                                                              |
| 9  | [mh "Triage"]                                                                                                                                                                                                                                                                                                                                                                                                                       |
| 10 | ("Austral* Triage Scale" or "Canadian Triage Acuity Scale" or "Emergency Severity Index" or "Manchester Triage Scale" or "South African Triage Scale" or "CTAS" or "ESI" or "MTS" or "SATS"):ti,ab,kw                                                                                                                                                                                                                               |
| 11 | 9 or 10                                                                                                                                                                                                                                                                                                                                                                                                                             |
| 12 | 4 and 8 and 11                                                                                                                                                                                                                                                                                                                                                                                                                      |
| 13 | limit 12 to (yr="1990-Current" and English)                                                                                                                                                                                                                                                                                                                                                                                         |
