# Supplementary material
Source: HighWire-hosted journal article supplement (https://bmjopen.bmj.com/content/12/4/e055132)
Supplement: inline-supplementary-material-3 [file inline-supplementary-material-3.pdf]

### 1 **Appendix 3. Data Extraction Instructions for Scoping Review of Triage Narratives**

2 Data will be extracted from studies into one table to facilitate comparisons. Multiple reports of a single  
3 study will be marked and grouped together in the data extraction tables to prevent double-counting the  
4 results originating from a single sample or intervention. Please complete all fields. If there are no data for  
5 a given field please mark “Not Applicable” or “Not reported”.

#### 6 **Table Items:**

7 1. Study ID: This will include the Author and Year, Digital Object Identifier, or Covidence assigned ID  
8 number.

9  
10 2. Extractor - First and Last initial of the author extracting the data.

11  
12 3. Sample Data

#### 13 *Data Source*

14 a. **Country/State/City:** Where the study data originated from. Extract as much information as  
15 possible in this field starting from least to most specific, separating levels with commas. If  
16 there are multiple responses at the same level separate them with a forward slash. Ex:  
17 Canada, Alberta, Edmonton/Calgary.

18 b. **Triage System:** Extract the name of the system, include specifics on versions or electronic if  
19 offered. (Ex: CTAS 2018, eCTAS)

20 c. **Source of Data:**

21 i. **Endorsing Organizations:** Extract the full names of any endorsing organization.  
22 (Ex: CTAS guidelines - National Emergency Nurses Association, Canadian  
23 Paediatrics Society, Canadian Association of emergency Physicians).

24 ii. **Source of Primary Data:** Refers to where the primary data were accessed from. For  
25 example, a provincial or national registry, or from hospital electronic records, these  
26 can include Regionalized Emergency Data Sets (Canadian Institute for Health  
27 Information, National Hospital Ambulatory Medical Care Survey, National  
28 Trauma Data Bank, etc).

29

#### 30 *Population*

31 d. **Number of Emergency departments:** Extract the number of hospitals or urgent care centres  
32 reported. If the hospital reports more than one department at one site record each as a unique  
33 department (Ex: University of Alberta Hospital Emergency, Stollery Hospital Emergency)

34 e. **Number of records:** Extract the number of patient records or visits that underwent final  
35 analysis. (Repeat visits by the same patient are counted individually)

36 f. **Number of patients:** If the study records the number of providers collecting data record the  
37 number included in the final analysis.

38

39 4. Study Data

#### 40 *Design*

41 a. **Qualitative or Quantitative:** Select one, for mixed or multiple methods record “both”. For  
42 position statements or guidance documents record “not applicable”

43 b. **Design type:** Record the authors reported design.

44 c. **Population of interest:** Summarize the authors’ population of interest.

45

## DRAFT THESIS PROPOSAL

2

46 *Data extraction methods*

- 47 d. **Automated:** If the authors used any form of automated technology (ex: machine learning,  
48 artificial intelligence) to extract data record the type used. (Ex: bag of words, keyword, index  
49 searching)  
50 e. **Not automated:** If data were manually extracted summarize the approach used (ex. Expert  
51 review and analysis of narrative).  
52

53 *Hypothesis testing*

- 54 f. **Internal uses:** Describe what the authors used the data for (ex: making predictions about  
55 admission).  
56 g. **External comparisons:** If the authors compare narrative data to other data sources (ex: ICD  
57 codes) summarize the data external data types.  
58 h. **Statistical testing methods:** Describe the statistical testing techniques.  
59

## 60 5. Data collected

61 *Description of data collected*

62 Extract any description of the narrative triage data collected (Ex: number of words in a narrative,  
63 number of errors in a narrative, completeness of records, etc.).  
64

65 *What were the authors' objectives?*

66 Extract what the authors report as the primary intention of their study. For primary research this  
67 could be the hypothesis being tested or phenomena being described. For guidance documents this  
68 could be a position, recommendation, or practice standard.  
69

70 *What were the authors findings or conclusions?*

71 Extract any recommendations made by the authors. This could include that further research is  
72 needed, or suggestions for future use of narrative data examples could include quality assurance,  
73 research, etc.  
74

- 75 6. **Presence of quality appraisal:** Extract any reported formal reporting or quality frameworks, or any  
76 other quality assessments measures.  
77

## DRAFT THESIS PROPOSAL

3

## 78 Data Extraction Form: Triage Narrative Scoping Review

| 1. Study ID | 2. Extractor | 3. Sample Data                                                                                                                                                                                                                                                                                                       | 4. Study Data                                                                                                                                                                                                                                                                                                                                                                                                                            | 5. Findings                                                                                                                                                                                                                          |
|-------------|--------------|----------------------------------------------------------------------------------------------------------------------------------------------------------------------------------------------------------------------------------------------------------------------------------------------------------------------|------------------------------------------------------------------------------------------------------------------------------------------------------------------------------------------------------------------------------------------------------------------------------------------------------------------------------------------------------------------------------------------------------------------------------------------|--------------------------------------------------------------------------------------------------------------------------------------------------------------------------------------------------------------------------------------|
|             |              | <p><u>Data Source</u></p> <p>a) <b>Country/State:</b></p> <p>b) <b>Triage System:</b></p> <p>c) <b>Source of Data:</b></p> <p><u>Population</u></p> <p>d) <b>Number of emergency departments:</b></p> <p>e) <b>Number of records:</b></p> <p>f) <b>Number of patients:</b></p> <p>g) <b>Number of providers:</b></p> | <p><u>Design</u></p> <p>a) <b>Qualitative or quantitative design?</b></p> <p>b) <b>Design type:</b></p> <p>c) <b>The population of interest:</b></p> <p><u>Data extraction methods:</u></p> <p>d) <b>Automated (specify method):</b></p> <p>e) <b>Not automated:</b></p> <p><u>Hypothesis testing</u></p> <p>f) <b>Internal uses:</b></p> <p>g) <b>External comparators:</b></p> <p>h) <b>Statistical testing methods (if used):</b></p> | <p><u>Description of data collected:</u></p> <p><u>What were the data used for?</u></p> <p><u>What were the authors' objectives?</u></p> <p><u>What were the primary findings?</u></p> <p><u>Were reporting guidelines used?</u></p> |

79
